# Supplementary material
Source: PubMed Central journal article supplement (PMC1383718)
Supplement: bj3940687add.pdf [file bj3940687add.pdf]

**Supplementary table 1: Results of amino-terminal sequence analysis of hydrolysed human FSAP.**

Multiple sequences were detected in parallel in nearly equimolar amounts. \*, cysteine residues; +, signal intensity of peak was too weak to identify corresponding amino acid.

| Peptide     | Cleavage after residue | Amino acid identified in the following cycle numbers: |   |   |   |   |   |   |   |   |    |
|-------------|------------------------|-------------------------------------------------------|---|---|---|---|---|---|---|---|----|
|             |                        | 1                                                     | 2 | 3 | 4 | 5 | 6 | 7 | 8 | 9 | 10 |
| F1          | Gly-23                 | F                                                     | S | L | M | S | L | L |   |   |    |
| F2          | Gly-23                 | F                                                     | S | L | M | S | L | L | E | S | L  |
| F3 and F4   | Lys-169                | R                                                     | R | S | K | F | T | * | A | * | P  |
|             | Arg-171                | S                                                     | K | F | T | * | A | * | P | D | Q  |
|             | Lys-173                | F                                                     | T | * | A | * | P | D | Q | F | K  |
|             | Lys-185                | G                                                     | K | F | * | E | I | G | S | D | D  |
| F5          | Lys-169                | R                                                     | R | S | + | F | T | + | A |   |    |
| F6          | Lys-319                | S                                                     | T | A | G | K | H | P | W | Q | A  |
|             | Arg-480                | Q                                                     | L | Y | D | H | M | I | D | D | S  |
| F7          | Lys-110                | V                                                     | Q | N | T | * | K | D | N | P | *  |
| F8          | Lys-110                | V                                                     | Q | N | T | * | K | D | N | P | *  |
|             | Lys-517                | D                                                     | G | T | Y | Y | V | Y | G | I | V  |
| F9          | Lys-319                | S                                                     | T | A | G | K | H | P | W | Q | A  |
| F10         | Gly-23                 | F                                                     | + | + | M | + | L | + | E |   |    |
|             | Lys-319                | S                                                     | T | A | G | + | H | P |   |   |    |
|             | Lys-470                | L                                                     | I | A | N | T | L | * | N |   |    |
|             | Arg-480                | Q                                                     | L | Y | D | H | M | I | D | D |    |
| F11 and F12 | Gly-23                 | F                                                     | S | L | M | S | L | L | E | S | L  |
|             | Lys-432                | T                                                     | V | * | L | P | D | G | S |   |    |
|             | Lys-470                | L                                                     | I | A | N | T | L | * | N | S |    |
|             | Arg-480                | Q                                                     | L | Y | D | H | M | I | D | D | S  |
| F13         | Lys-517                | D                                                     | G | T | Y | Y | V | Y | G | I | V  |
|             | Lys-110                | V                                                     | Q | N |   |   |   |   |   |   |    |
|             | Lys-319                | S                                                     | T | A |   |   |   |   |   |   |    |
|             | Lys-470                | L                                                     | I | A | N | T | L |   |   |   |    |
| F14         | Arg-480                | Q                                                     | L | Y | D |   |   |   |   |   |    |
|             | Gly-23                 | F                                                     | + | L | M | + | L | L | E | S | L  |
| F15         | Lys-169                | R                                                     | R | + | + | F | T | + | A |   |    |
|             | Lys-110                | V                                                     | + | N | T | * | + | D | N | P |    |
| F16         | Lys-432                | T                                                     | + | * | L | P | + | G |   |   |    |
|             | Lys-470                | L                                                     | I | A | N | + | L | * |   |   |    |
|             | Arg-480                | Q                                                     | + | Y | + | + | + | I |   |   |    |
|             | Lys-110                | V                                                     | + | N | T | * | + | D | N | P |    |
| F17         | Lys-432                | T                                                     | + | * | L | P | D | G | + | F |    |
|             | Lys-470                | L                                                     | I | A | N | + | L | * | N | S |    |
|             | Arg-480                | Q                                                     | + | Y | D | H | M | I | + | D |    |
|             | Lys-110                | V                                                     | Q | N | T | * | K | D | N | P |    |
| F18         | Lys-173                | F                                                     | T | * | A | * | P | G | Q | F |    |
|             | Lys-185                | G                                                     | K | F | * | E | I | G | S | + |    |
|             | Lys-294                | L                                                     | P | G | F | D | S | * | G | K | T  |
|             | Lys-432                | T                                                     | V | * | L | P | D | G | S | F | P  |
| F19         | Lys-470                | L                                                     | I | A | N | T | L | * | N | S | R  |
|             | Arg-480                | Q                                                     | L | Y | D | H | M | I | D | D | S  |
|             | Lys-517                | D                                                     | G | T | Y | Y | V | Y | G | I | V  |
|             | Lys-319                | S                                                     | T | A | G | K | H | P | W | Q | A  |
|             | Lys-416                | L                                                     | K | P | V | D | G | H | * | A | L  |

**Supplementary Figure 1**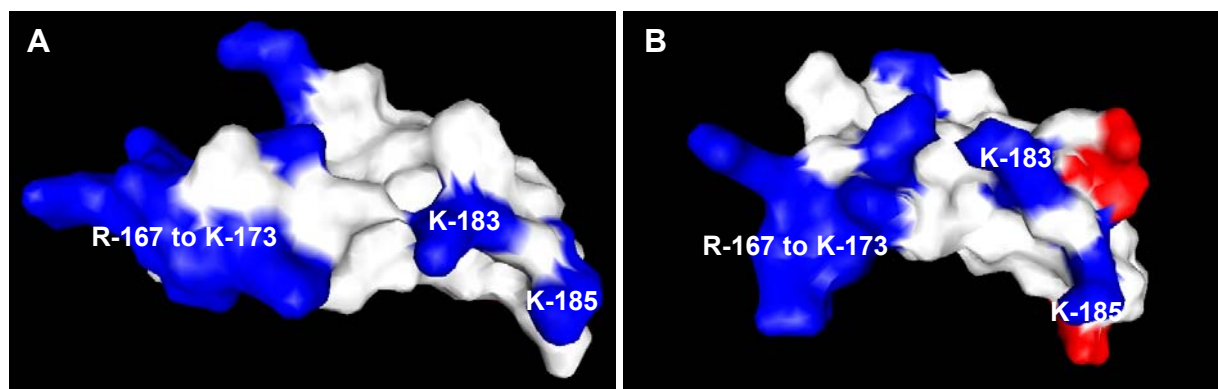

Alignment with HUMAN TPA P00750

```

TPA   PVKSCSEPRCFNNGGTCQQALYFSDFVCQCPEGFAGKCE
FSAP  VVPVCRPNPCQNGATCSRHKRRSKFTCACPDQFKGKFC
  
```

Alignment with HUMAN Factor IX P00740

```

FIX   DGDQCESNPCLNGGCKDDI--NSYECWCPFGFEGKNCE
FSAP  VVPVCRPNPCQNGATCSRHKRRSKFTCACPDQFKGKFC
  
```

**Model of the three-dimensional structure of EGF3 of human FSAP:** A) The available solution structure of the closely related EGF domain of human tissue-type plasminogen activator (TPA) (Protein Data Bank code 1tpg) was used to model the EGF3 domain of FSAP using SWISS-MODEL. Basic residues are drawn in blue, acidic residues in red and neutral residues in white. Residues Arg-167 to Lys-173, Lys-183, and Lys-185 are indicated. B) Similar results were obtained when the modelling was performed with the EGF1 domain of human Factor IX (Protein Data Bank code 1ixa). Alignment between the EGF3 domain of FSAP and the EGF domain of tPA as well as the EGF1 domain of Factor IX is shown.
